# Supplementary material for: Extra-Heavy Crude Oil Degradation by Alternaria sp. Isolated from Deep-Sea Sediments of the Gulf of Mexico
Source: MDPI journal article supplement (doi:10.3390/app11136090), 2021-06-30
Supplement: s1 [file s1]

Supplementary material

Table S1. Geolocalization and data of stations sampled in the Gulf of Mexico.

| Station | Longitude<br>[Grades] | Longitude<br>[Min] | Latitude<br>[Grades] | Latitude<br>[Min] | Depth<br>(meters) | Temperature<br>(°C) | Salinity<br>(psu) | Dissolved<br>oxygen<br>(mL/L) |
|---------|-----------------------|--------------------|----------------------|-------------------|-------------------|---------------------|-------------------|-------------------------------|
| A1      | 95                    | 50.130             | 25.00                | 53.700            | 877.00            | 5.8                 | 27.5              | 3.4                           |
| A2      | 95                    | 33.829             | 25.00                | 53.913            | 1792.00           | 4.2                 | 27.7              | 4.7                           |
| A3      | 95                    | 14.370             | 25.00                | 53.320            | 1926.82           | 4.2                 | 27.7              | 4.7                           |
| A4      | 94                    | 42.601             | 25.00                | 53.570            | 3166.00           | 4.3                 | 27.7              | 4.6                           |
| B5      | 96                    | 15.359             | 25.00                | 39.639            | 529.00            | 8.4                 | 27.2              | 2.5                           |
| B6      | 95                    | 52.510             | 25.00                | 39.620            | 1006.00           | 5.3                 | 27.5              | 3.6                           |
| B7      | 95                    | 35.629             | 25.00                | 40.523            | 1374.00           | 4.4                 | 27.7              | 4.5                           |
| B8      | 95                    | 15.870             | 25.00                | 39.800            | 2103.00           | 4.2                 | 27.7              | 4.7                           |
| B9      | 94                    | 54.913             | 25.00                | 40.095            | 2962.00           | 4.3                 | 27.7              | 4.6                           |
| C10     | 93                    | 18.368             | 19.00                | 10.430            | 728.00            | 6.7                 | 27.4              | 2.9                           |
| C11     | 93                    | 30.398             | 19.00                | 37.380            | 857.00            | 5.7                 | 27.5              | 3.4                           |
| C12     | 93                    | 46.309             | 20.00                | 1.116             | 1452.00           | 4.3                 | 27.7              | 4.5                           |
| C13     | 94                    | 18.500             | 20.00                | 36.060            | 2368.00           | 4.2                 | 27.7              | 4.7                           |
| C14     | 94                    | 45.130             | 20.00                | 43.980            | 3200.36           | 4.3                 | 27.7              | 4.6                           |
| D15     | 93                    | 36.240             | 19.00                | 10.008            | 600.00            | 7.2                 | 27.3              | 2.8                           |
| D16     | 94                    | 0.079              | 19.00                | 2.697             | 696.00            | 6.5                 | 27.4              | 3.0                           |
| D17     | 94                    | 5.469              | 19.00                | 36.543            | 1026.00           | 5.2                 | 27.5              | 3.7                           |
| D18     | 94                    | 20.510             | 19.00                | 55.910            | 1281.00           | 4.4                 | 27.7              | 4.4                           |
| N1      | 96                    | 45.901             | 24.00                | 25.702            | 849.00            | 6.3                 | 27.4              | 3.1                           |
| N2      | 96                    | 7.980              | 25.00                | 26.270            | 972.00            | 5.1                 | 27.6              | 3.8                           |
| N3      | 95                    | 51.070             | 24.00                | 36.380            | 2474.00           | 4.3                 | 27.7              | 4.7                           |
| N4      | 95                    | 52.130             | 23.00                | 36.460            | 2839.00           | 4.3                 | 27.7              | 4.7                           |
| N5      | 94                    | 45.010             | 22.00                | 45.050            | 3405.00           | 4.3                 | 27.7              | 4.6                           |
| N6      | 94                    | 45.560             | 24.00                | 45.200            | 3465.00           | 4.3                 | 27.7              | 4.6                           |

**Table S2.** Sampling stations and locations from where the fungal strains were isolated.

| Strain                           | Station/Zone       |
|----------------------------------|--------------------|
| <i>Cladosporium halotolerans</i> | C11, Coatzacoalcos |
| <i>Stemphylium</i> sp.           | C12, Coatzacoalcos |
| <i>Alternaria</i> sp.            | N2, Perdido        |
| <i>Penicillium</i> sp. 1         | D16, Coatzacoalcos |
| <i>Penicillium</i> sp. 2         | C11, Coatzacoalcos |

**Table S3.** Reference DNA sequences of the ITS rDNA, 18S and  $\beta$ -tubulin markers used in the phylogenetic analyses. A letter was added after the ID of each isolate to identify each molecular marker; Z for 18S, T for ITS, B for  $\beta$ -tubulin region close to 5' end and LR for  $\beta$ -tubulin region close to 3' end.

| OTU                     | Sequence ID (18S) | NCBI accession number | Hit                                              | Cover | % ID  | NCBI accession number |
|-------------------------|-------------------|-----------------------|--------------------------------------------------|-------|-------|-----------------------|
| <i>Cladosporium</i> sp. | 1Z                | MW412481              | <i>Cladosporium velox</i>                        | 100   | 99.8  | NG_062725.1           |
|                         |                   |                       | <i>Cladosporium sphaerospermum</i>               | 100   | 100   | JN939024.1            |
|                         |                   |                       | <i>Cladosporium</i> sp.                          | 100   | 100   | MT093347.1            |
|                         |                   |                       | <i>Cladosporium cladosporoides</i>               | 100   | 100   | KT582530.1            |
|                         |                   |                       | <i>Cladosporium halotolerans</i>                 | 100   | 100   | MT000326.1            |
| <i>Stemphylium</i> sp.  | 3Z                | MW412484              | <i>Pleospora herbarum/Stemphylium vesicarium</i> | 100   | 99.78 | GU238232.1            |
|                         |                   |                       | <i>Pleospora herbarum/Stemphylium vesicarium</i> | 100   | 99.78 | DQ767648.1            |
|                         |                   |                       | <i>Pleospora herbarum/Stemphylium vesicarium</i> | 100   | 99.78 | KY659567.1            |
|                         |                   |                       | <i>Stemphylium vesicarium</i>                    | 100   | 99.78 | MH050984.1            |

|                          |                   |                       | <i>Stemphylium botryosum</i>         | 100   | 99.78 | NG_061146.1           |
|--------------------------|-------------------|-----------------------|--------------------------------------|-------|-------|-----------------------|
|                          |                   |                       | <i>Alternaria</i> sp.                | 99    | 99.64 | MT649579.1            |
|                          |                   |                       | <i>Alternaria tenuissima</i>         | 99    | 99.64 | MN075309.1            |
| <i>Alternaria</i> sp.    | 4Z                | MW412485              | <i>Alternaria alternata</i>          | 99    | 99.64 | MT535855.1            |
|                          |                   |                       | <i>Alternaria citri</i>              | 99    | 99.64 | MF989222.1            |
|                          |                   |                       | <i>Alternaria tomatophila</i>        | 99    | 99.64 | MK577728.1            |
|                          |                   |                       | <i>Penicillium</i> sp.               | 100   | 100   | MT649587.1            |
|                          |                   |                       | <i>Penicillium chrysogenum</i>       | 100   | 100   | MN826497.1            |
| <i>Penicillium</i> sp. 1 | 5Z                | MW412482              | <i>Penicillium spinulosum</i>        | 100   | 100   | MF072609.1            |
|                          |                   |                       | <i>Penicillium commune</i>           | 100   | 100   | MF072605.1            |
|                          |                   |                       | <i>Penicillium solitum</i>           | 100   | 100   | JN642222.1            |
|                          |                   |                       | <i>Penicillium</i> sp.               | 100   | 100   | MN906962.1            |
|                          |                   |                       | <i>Penicillium namyslowskii</i>      | 100   | 100   | KM096326.1            |
| <i>Penicillium</i> sp. 2 | 6Z                | MW412483              | <i>Penicillium corylophilum</i>      | 100   | 100   | JN938959.1            |
|                          |                   |                       | <i>Penicillium phialosporum</i>      | 100   | 99.9  | AF245266.1            |
|                          |                   |                       | <i>Penicillium limosum</i>           | 100   | 99.71 | NG_062729.1           |
| OTU                      | Sequence ID (ITS) | NCBI accession number | Hit                                  | Cover | % ID  | NCBI accession number |
|                          |                   |                       | <i>Cladosporium halotolerans</i>     | 100   | 99.45 | MH864391.1            |
|                          |                   |                       | <i>Cladosporium parahalotolerans</i> | 100   | 99.45 | MF473158.1            |
| <i>Cladosporium</i> sp.  | 1T                | MW412494              | <i>Cladosporium</i> sp.              | 99    | 99.45 | KF293975.1            |
|                          |                   |                       | <i>Cladosporium cladosporioides</i>  | 100   | 98.72 | EF577236.1            |
|                          |                   |                       | <i>Cladosporium sphaerospermum</i>   | 97    | 99.81 | AB572902.1            |
|                          |                   |                       | <i>Stemphylium vesicarium</i>        | 100   | 100   | MK713547.1            |
|                          |                   |                       | <i>Stemphylium eturmiunum</i>        | 100   | 100   | MK432743.1            |
| <i>Stemphylium</i> sp.   | 3T                | MW412490              | <i>Stemphylium</i> sp.               | 100   | 100   | MG065794.1            |
|                          |                   |                       | <i>Stemphylium lucomagnoense</i>     | 100   | 99.62 | MK691703.1            |
|                          |                   |                       | <i>Stemphylium solani</i>            | 100   | 99.62 | LC592374.1            |
|                          |                   |                       | <i>Alternaria</i> sp.                | 100   | 100   | MF776039.1            |
| <i>Alternaria</i> sp.    | 4T                | MW412491              | <i>Alternaria arborescens</i>        | 100   | 100   | KY484887.1            |

|                          |                                 |                       | <i>Alternaria alternata</i>         | 100   | 100   | KJ744342.1            |
|--------------------------|---------------------------------|-----------------------|-------------------------------------|-------|-------|-----------------------|
|                          |                                 |                       | <i>Alternaria tenuissima</i>        | 100   | 100   | MN495830.1            |
|                          |                                 |                       | <i>Alternaria citri</i>             | 100   | 100   | EF104220.1            |
|                          |                                 |                       | <i>Penicillium griseoroseum</i>     | 100   | 100   | MT635309.1            |
|                          |                                 |                       | <i>Penicillium goetzii</i>          | 100   | 100   | MT558933.1            |
| <i>Penicillium</i> sp. 1 | 5T                              | MW412492              | <i>Penicillium rubens</i>           | 100   | 100   | MT558923.1            |
|                          |                                 |                       | <i>Penicillium camemberti</i>       | 100   | 100   | MT529868.1            |
|                          |                                 |                       | <i>Penicillium vinaceum</i>         | 100   | 100   | MT482619.1            |
|                          |                                 |                       | <i>Penicillium corylophilum</i>     | 100   | 100   | MK450687.1            |
|                          |                                 |                       | <i>Penicillium albidum</i>          | 100   | 100   | MH855058.1            |
| <i>Penicillium</i> sp. 2 | 6T                              | MW412493              | <i>Penicillium obscurum</i>         | 100   | 100   | KP016815.1            |
|                          |                                 |                       | <i>Penicillium chloroleucon</i>     | 100   | 100   | KP016813.1            |
|                          |                                 |                       | <i>Penicillium fagi</i>             | 100   | 99.81 | MH865721.1            |
| OTU                      | Sequence ID ( $\beta$ -tubulin) | NCBI accession number | Hit                                 | Cover | % ID  | NCBI accession number |
|                          |                                 |                       | <i>Cladosporium halotolerans</i>    | 100   | 99.73 | EF101421.1            |
|                          |                                 |                       | <i>Cladosporium halotolerans</i>    | 100   | 99.47 | EF101423.1            |
| <i>Cladosporium</i> sp.  | 1B                              | MZ392424              | <i>Cladosporium psychrotolerans</i> | 100   | 89.32 | EF101443.1            |
|                          |                                 |                       | <i>Cladosporium langeronii</i>      | 100   | 88.48 | EF101434.1            |
|                          |                                 |                       | <i>Cladosporium sphaerospermum</i>  | 100   | 87.31 | KY952176.1            |
|                          |                                 |                       | <i>Stemphylium vesicarium</i>       | 100   | 98.41 | MT671909.1            |
|                          |                                 |                       | <i>Stemphylium vesicarium</i>       | 100   | 97.77 | JQ671944.1            |
| <i>Stemphylium</i> sp.   | 3B                              | MZ392425              | <i>Stemphylium callistephi</i>      | 100   | 96.18 | JQ671943.1            |
|                          |                                 |                       | <i>Stemphylium</i> sp.              | 99    | 95.15 | JN105110.1            |
|                          |                                 |                       | <i>Stemphylium solani</i>           | 99    | 94.87 | JN105109.1            |
|                          |                                 |                       | <i>Penicillium rubens</i>           | 100   | 100   | MT393580.1            |
|                          |                                 |                       | <i>Penicillium chrysogenum</i>      | 100   | 100   | MK675757.1            |
| <i>Penicillium</i> sp. 1 | 5B                              | MZ392426              | <i>Penicillium rubens</i>           | 100   | 100   | KU896998.1            |
|                          |                                 |                       | <i>Penicillium chrysogenum</i>      | 100   | 100   | KF225098.1            |
|                          |                                 |                       | <i>Penicillium rolsii</i>           | 100   | 100   | LT559055.1            |

| <i>Penicillium</i> sp. 2 | 6B                              | MZ392427              | <i>Penicillium corylophilum</i> | 100   | 100   | MK451126.1            |
|--------------------------|---------------------------------|-----------------------|---------------------------------|-------|-------|-----------------------|
|                          |                                 |                       | <i>Penicillium obscurum</i>     | 100   | 99.08 | JX141068.1            |
|                          |                                 |                       | <i>Penicillium corylophilum</i> | 100   | 99.08 | KF225092.1            |
|                          |                                 |                       | <i>Penicillium humuli</i>       | 98    | 99.07 | KP016756.1            |
|                          |                                 |                       | <i>Penicillium pagulum</i>      | 100   | 98.17 | JX141132.1            |
| OTU                      | Sequence ID ( $\beta$ -tubulin) | NCBI accession number | Hit                             | Cover | % ID  | NCBI accession number |
| <i>Alternaria</i> sp.    | 4LR                             | MZ392428              | <i>Alternaria alternata</i>     | 99    | 99.27 | XM_01853319.1         |
|                          |                                 |                       | <i>Alternaria alternata</i>     | 99    | 99.27 | HQ413316.1            |
|                          |                                 |                       | <i>Alternaria alternata</i>     | 99    | 99.48 | CP061884.1            |
|                          |                                 |                       | <i>Alternaria lini</i>          | 99    | 98.64 | Y17082.1              |
|                          |                                 |                       | <i>Alternaria brassicae</i>     | 99    | 97.48 | Y17074.1              |
|                          |                                 |                       | <i>Alternaria infectoria</i>    | 99    | 98.85 | Y17083.1              |
|                          |                                 |                       | <i>Alternaria linicola</i>      | 99    | 96.96 | Y17085.1              |
|                          |                                 |                       | <i>Alternaria solani</i>        | 99    | 97.48 | MK388240.1            |
|                          |                                 |                       | <i>Alternaria solani</i>        | 99    | 97.48 | HQ413317.1            |

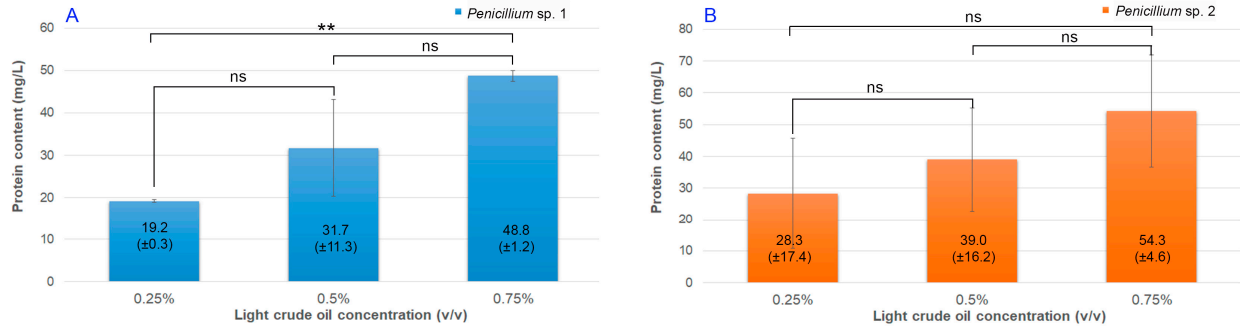

**Figure S1.** Protein content (average of three replicates) of *Penicillium* sp. 1 (**A**) and *Penicillium* sp. 2 (**B**) grown under different light crude oil concentrations. The cultures were grown in Czapeck minimal medium with 0.25%, 0.5% and 0.75% v/v light crude oil as the unique carbon source. For *Penicillium* sp. 1 (**A**), Post hoc comparisons using the Tukey HSD test, indicated that the mean score protein content at 0.25% concentration of light crude oil ( $M = 19.2$ ,  $SD = 0.3$ ) was significantly different from that at 0.75% concentration ( $M = 48.8$ ,  $SD = 1.2$ ). In contrast, the content at 0.5% concentration ( $M = 31.7$ ,  $SD = 11.3$ ) did not significantly differ from the content at the other two concentrations. For *Penicillium* sp. 2 (**B**), Post hoc comparisons using the Tukey HSD test indicated that the mean score for protein content at 0.25% ( $M = 28.3$ ,  $SD = 17.4$ ), 0.5% ( $M = 39.0$ ,  $SD = 16.2$ ) and 0.75% concentrations ( $M = 54.3$ ,  $SD = 4.6$ ) did not significantly differ.

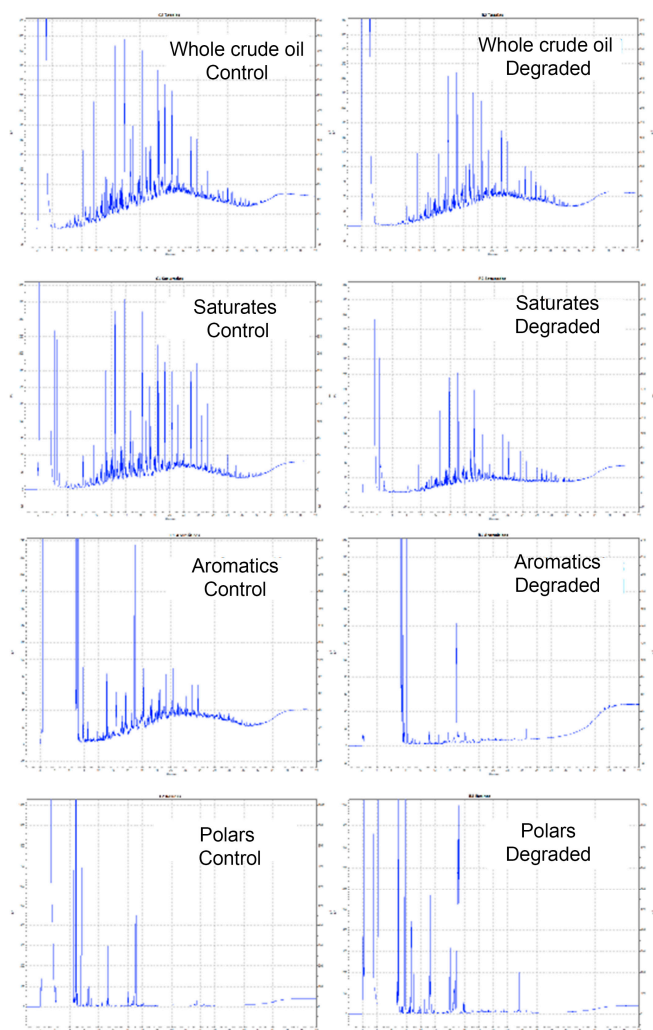

**Figure S2.** Chromatograms of whole extra-heavy crude oil and its saturates, aromatics and polars (SAP) fractions. Left column corresponds to abiotic controls and right column to degraded samples. A) Chromatograms from whole crude oil and SAP fractions from abiotic controls B) Chromatograms of whole crude oil and SAP fractions by *Alternaria* sp.

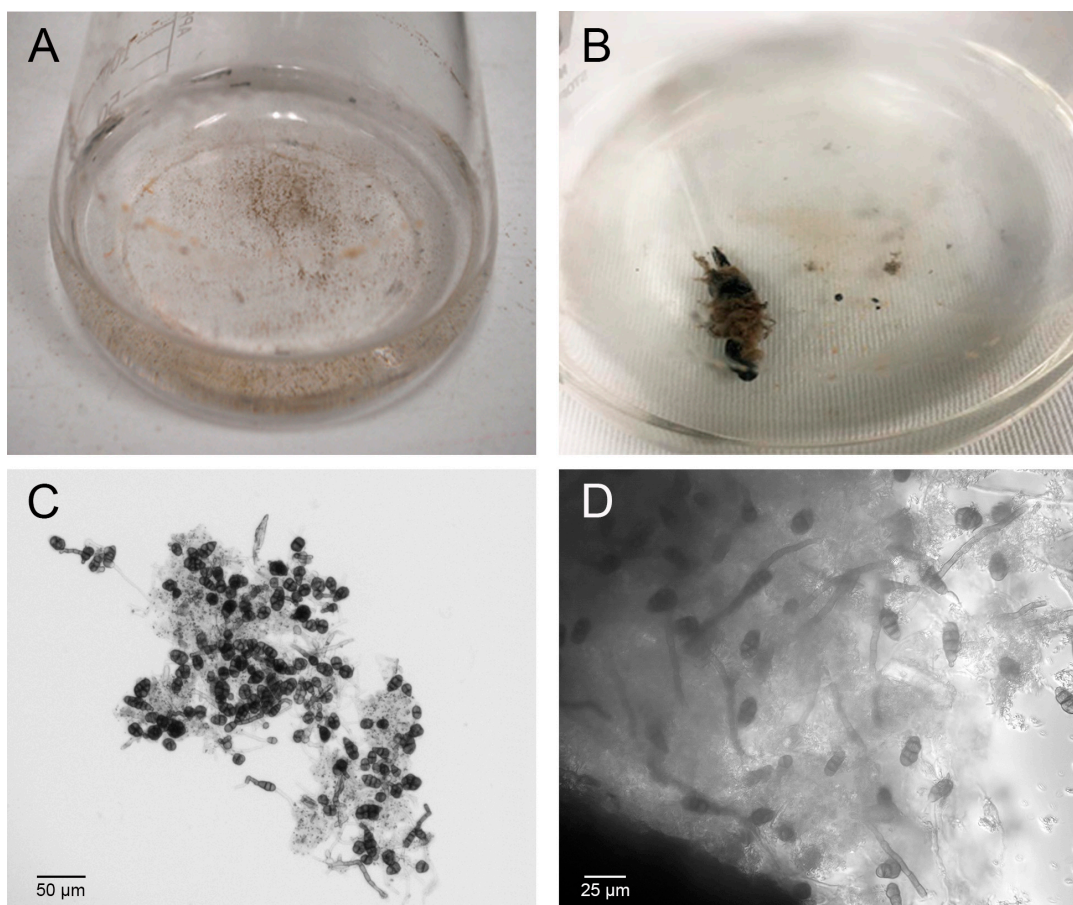

**Figure S3.** *Alternaria* sp. grown with (B,D) or without (A,C) 0.5% w/v of extra-heavy crude oil as sole carbon source after a month of incubation. A brown mass of mycelium surrounding the extra-heavy crude oil can be observed at the bottom of the flask (B). Conidia and some germinated conidia could be seen in the medium without crude oil (C), whereas a mass of hyphae and conidia was observed in the culture with crude oil (D).
